# Supplementary material for: Fragmentation of typical sulfonamide drugs via heterolytic bond cleavage and stepwise rearrangement
Source: Royal Society of Chemistry journal article supplement (doi:10.1039/c4ra07737g), 2014-01-01
Supplement: c4ra07737g1.pdf [file c4ra07737g1.pdf]

1

## Supplementary materials

### 2 **Manuscript title:**

3 Fragmentation of typical sulfonamide drugs via heterolytic bond cleavage and  
4 stepwise rearrangement

5

### 6 **Authors:**

7 Dean Song,<sup>†,‡</sup> Huijuan Liu,<sup>\*,†</sup> Aiqian, Zhang,<sup>†</sup> and Jiuhui Qu<sup>†</sup>

8

9 <sup>†</sup> *Research Center for Eco-Environmental Sciences, Chinese Academy of Sciences,*  
10 *Beijing 100085, China*

11 <sup>‡</sup> *University of Chinese Academy of Sciences, Beijing 100039, China*

12

13 \* Corresponding author. Tel.: +86 10 62849128; fax: +86 10 62923541.

14 E-mail address: [hjliu@rcees.ac.cn](mailto:hjliu@rcees.ac.cn) (H. Liu)

16 Fig. S1 The positive ESI-MS/MS spectrum of sulfamethoxazole (a representative  
17 substrate for sulfonamide drugs studied in this work) recorded over a mass scan range  
18 of  $m/z$  50–300 with a collision energy of 10 eV (the capillary voltage = 3500 V, and  
19 the drying gas = 10 L  $\text{min}^{-1}$  at 200 °C).

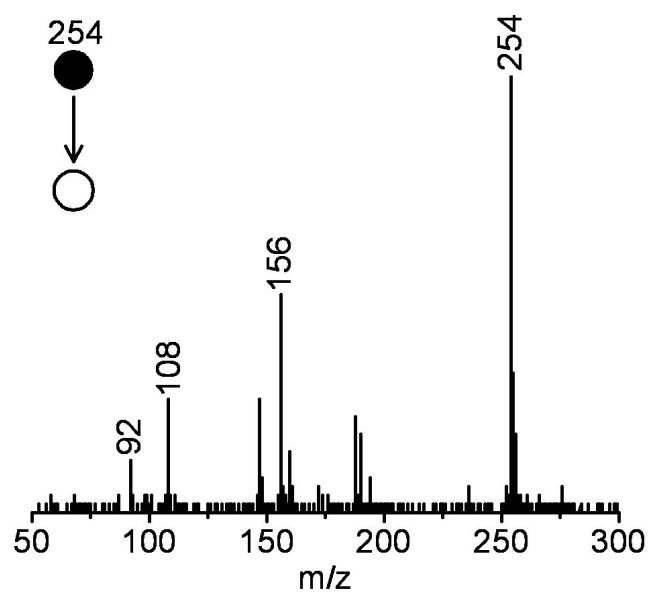

20

22 Fig. S2 The topology graphs of (a) **NP3** and (b) **NP2** with the bond critical points  
23 (BCP indicated by small orange points), the ring critical points (RCB indicated by  
24 small yellow points), and the bond paths (covalent interaction indicated by green lines,  
25 closed-shell interaction indicated by brown lines).

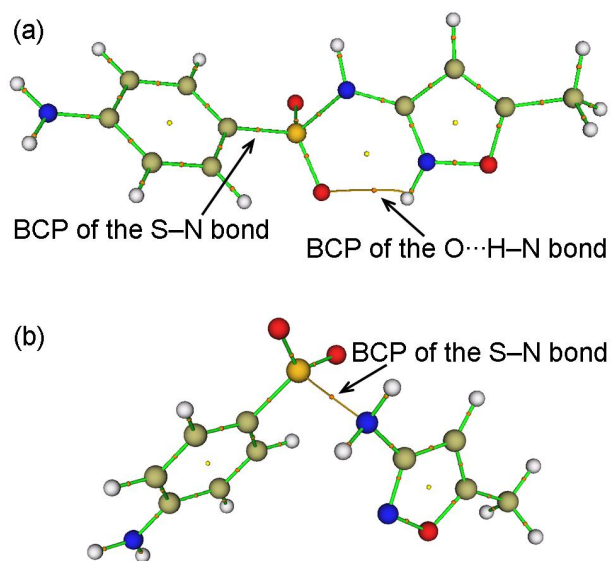

26

28 Fig. S3 The front and side views of the molecular structures of **NP2** and **NP3**.

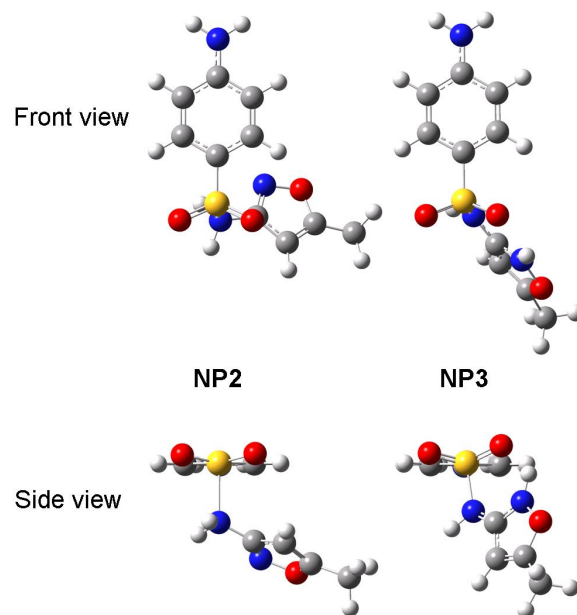

29

|    |             |                   |             |             |
|----|-------------|-------------------|-------------|-------------|
| 31 | <b>NP1:</b> | -1175.856091 a.u. |             |             |
| 32 | S           | 0.08771800        | 1.70985400  | 0.34119100  |
| 33 | O           | -2.81943700       | -1.68895200 | 0.28367000  |
| 34 | O           | 0.53086100        | 2.98239400  | -0.22778500 |
| 35 | O           | -0.37157800       | 1.56220800  | 1.71575800  |
| 36 | N           | -1.08638200       | 1.16469500  | -0.75185000 |
| 37 | N           | -1.64649600       | -0.94564000 | 0.13334500  |
| 38 | N           | 4.70839100        | -2.13235200 | -0.26593200 |
| 39 | C           | 1.44963000        | 0.53041700  | 0.12579800  |
| 40 | C           | 2.51256800        | 0.88383400  | -0.70365000 |
| 41 | C           | 1.42844900        | -0.67499200 | 0.83144100  |
| 42 | C           | -2.02989700       | 0.17197500  | -0.44584500 |
| 43 | C           | 3.55012300        | -1.19231600 | -0.13938200 |
| 44 | C           | 3.59039700        | 0.00489900  | -0.84343200 |
| 45 | C           | 2.49884400        | -1.55844700 | 0.69614100  |
| 46 | C           | -3.42666900       | 0.19658000  | -0.71681400 |
| 47 | C           | -3.86474000       | -1.00471600 | -0.23588200 |
| 48 | C           | -5.19882400       | -1.65828400 | -0.16332300 |
| 49 | H           | -1.38638700       | 1.92102100  | -1.35897600 |
| 50 | H           | 2.50373000        | 1.83695700  | -1.22114600 |
| 51 | H           | 0.58184600        | -0.92388900 | 1.46033000  |
| 52 | H           | 4.42894500        | 0.26809000  | -1.48285100 |
| 53 | H           | 2.49623900        | -2.50213400 | 1.23519200  |
| 54 | H           | -4.00903900       | 0.98289300  | -1.17227700 |
| 55 | H           | -5.95932800       | -1.01034800 | -0.60258100 |
| 56 | H           | -5.19378800       | -2.61059500 | -0.70350100 |
| 57 | H           | -5.47102800       | -1.86406200 | 0.87687600  |
| 58 | H           | 5.33219100        | -1.84733100 | -1.02925700 |
| 59 | H           | 4.39607600        | -3.08995600 | -0.46758400 |
| 60 | H           |                   | 5.27041000  | -2.16414500 |
|    |             |                   |             | 0.59433200  |

|    |             |                   |             |             |             |
|----|-------------|-------------------|-------------|-------------|-------------|
| 61 | <b>NP2:</b> | -1175.877859 a.u. |             |             |             |
| 62 | S           | 0.32167400        | 1.81823300  | 0.40575500  |             |
| 63 | O           | -2.67719200       | -1.79574800 | -0.64610200 |             |
| 64 | O           | 0.711173900       | 3.07818100  | -0.21254800 |             |
| 65 | O           | -0.54464700       | 1.68617800  | 1.56604400  |             |
| 66 | N           | -1.15792000       | 1.30413000  | -1.10064900 |             |
| 67 | N           | -1.68085000       | -0.97796100 | -1.14943800 |             |
| 68 | N           | 4.32772300        | -2.41652800 | -0.10090600 |             |
| 69 | C           | 1.50259600        | 0.58659600  | 0.27508700  |             |
| 70 | C           | 2.57551200        | 0.74996000  | -0.63603900 |             |
| 71 | C           | 1.36351800        | -0.59911800 | 1.03777500  |             |
| 72 | C           | -2.02683500       | 0.23093000  | -0.76390200 |             |
| 73 | C           | 3.40361700        | -1.44246200 | 0.01659300  |             |
| 74 | C           | 3.51375600        | -0.24775000 | -0.75314100 |             |
| 75 | C           | 2.30744200        | -1.59075400 | 0.91344400  |             |
| 76 | C           | -3.22390800       | 0.26006600  | -0.00606600 |             |
| 77 | C           | -3.59447500       | -1.05754300 | 0.02921500  |             |
| 78 | C           | -4.74290400       | -1.79018300 | 0.62225800  |             |
| 79 | H           | -1.65134400       | 2.19105100  | -1.22192800 |             |
| 80 | H           | 2.67292100        | 1.66454400  | -1.21096100 |             |
| 81 | H           | 0.53483700        | -0.71249900 | 1.72733800  |             |
| 82 | H           | 4.35334000        | -0.12150000 | -1.42946300 |             |
| 83 | H           | 2.22009700        | -2.49475400 | 1.50768900  |             |
| 84 | H           | -3.72535700       | 1.10459200  | 0.44107600  |             |
| 85 | H           | -5.39406800       | -1.09733300 | 1.15775100  |             |
| 86 | H           | -5.32547800       | -2.28853600 | -0.15927400 |             |
| 87 | H           | -4.39351200       | -2.55742200 | 1.32037400  |             |
| 88 | H           | 5.11510100        | -2.32348700 | -0.72540200 |             |
| 89 | H           | 4.26952200        | -3.26587300 | 0.44114600  |             |
| 90 | H           |                   | -0.63462300 | 1.09466200  | -1.95397200 |

|     |             |                   |             |             |            |
|-----|-------------|-------------------|-------------|-------------|------------|
| 91  | <b>NP3:</b> | -1175.896185 a.u. |             |             |            |
| 92  | S           | 0.23666300        | 1.19592600  | 0.23815700  |            |
| 93  | O           | -3.97710100       | -0.34408900 | 0.90161700  |            |
| 94  | O           | 0.26983300        | 2.47443300  | -0.45643300 |            |
| 95  | O           | -0.33969200       | 1.04521600  | 1.58205100  |            |
| 96  | N           | -0.89077600       | 0.18318400  | -0.72897200 |            |
| 97  | N           | -2.65770000       | 0.04519200  | 0.85716500  |            |
| 98  | N           | 5.43525400        | -1.54770800 | -0.22271400 |            |
| 99  | C           | 1.76309500        | 0.37140500  | 0.09922000  |            |
| 100 | C           | 2.70822300        | 0.83308100  | -0.83634200 |            |
| 101 | C           | 2.04872700        | -0.72687600 | 0.93251200  |            |
| 102 | C           | -2.16018700       | -0.10404000 | -0.37671800 |            |
| 103 | C           | 4.23694100        | -0.91831900 | -0.11617000 |            |
| 104 | C           | 3.92849900        | 0.19305900  | -0.94131800 |            |
| 105 | C           | 3.26943400        | -1.36279700 | 0.82307600  |            |
| 106 | C           | -3.20775100       | -0.64797600 | -1.17658200 |            |
| 107 | C           | -4.28811200       | -0.77137700 | -0.34995900 |            |
| 108 | C           | -5.67505400       | -1.25827800 | -0.54454200 |            |
| 109 | H           | -0.68085800       | 0.14706900  | -1.72168700 |            |
| 110 | H           | 2.48926800        | 1.69772600  | -1.45346000 |            |
| 111 | H           | 1.32655100        | -1.06070900 | 1.66962200  |            |
| 112 | H           | 4.66443300        | 0.55441800  | -1.65295900 |            |
| 113 | H           | 3.49830900        | -2.20259100 | 1.47197500  |            |
| 114 | H           | -3.15296100       | -0.90419100 | -2.22326800 |            |
| 115 | H           | -5.81778600       | -1.57113400 | -1.57964900 |            |
| 116 | H           | -5.87842000       | -2.10717900 | 0.11618000  |            |
| 117 | H           | -6.39373900       | -0.46681000 | -0.30875100 |            |
| 118 | H           | 6.14995700        | -1.20798800 | -0.84709600 |            |
| 119 | H           | 5.68712200        | -2.30211000 | 0.39638100  |            |
| 120 | H           |                   | -2.25314500 | 0.47223700  | 1.68691100 |

|     |             |                   |             |             |
|-----|-------------|-------------------|-------------|-------------|
| 121 | <b>OPI:</b> | -1175.862938 a.u. |             |             |
| 122 | S           | 0.27894900        | 1.77356600  | 0.11568900  |
| 123 | O           | -2.74807000       | -1.44131100 | 0.69013800  |
| 124 | O           | 0.74002100        | 3.00285400  | -0.50567100 |
| 125 | O           | -0.15890900       | 1.92515600  | 1.65919500  |
| 126 | N           | -1.17483200       | 1.41441400  | -0.57485300 |
| 127 | N           | -1.72712400       | -0.49430600 | 0.71648700  |
| 128 | N           | 4.30835500        | -2.48406000 | -0.22932000 |
| 129 | C           | 1.42949600        | 0.48597800  | 0.05456800  |
| 130 | C           | 2.42079000        | 0.57244800  | -0.95107400 |
| 131 | C           | 1.39433500        | -0.60097500 | 0.95683400  |
| 132 | C           | -2.01885100       | 0.32860000  | -0.26246400 |
| 133 | C           | 3.36761800        | -1.51744800 | -0.13986700 |
| 134 | C           | 3.37424700        | -0.41745100 | -1.04076000 |
| 135 | C           | 2.35736000        | -1.58185400 | 0.85787300  |
| 136 | C           | -3.21426000       | -0.01466100 | -0.94755500 |
| 137 | C           | -3.63013000       | -1.14077500 | -0.29133400 |
| 138 | C           | -4.79862100       | -2.04612100 | -0.44657700 |
| 139 | H           | -1.58628100       | 2.23878400  | -1.00732500 |
| 140 | H           | 2.44604400        | 1.41652300  | -1.63143800 |
| 141 | H           | 0.60960500        | -0.67844700 | 1.69941700  |
| 142 | H           | 4.14508600        | -0.35045700 | -1.80201000 |
| 143 | H           | 2.33855400        | -2.41830800 | 1.54938800  |
| 144 | H           | -3.68223200       | 0.48014200  | -1.78465800 |
| 145 | H           | -5.42601300       | -1.71285800 | -1.27489100 |
| 146 | H           | -4.46850200       | -3.07095500 | -0.64376200 |
| 147 | H           | -5.39984600       | -2.05756400 | 0.46822300  |
| 148 | H           | 5.03309000        | -2.44949900 | -0.92992300 |
| 149 | H           | 4.31875800        | -3.26797100 | 0.40514600  |
| 150 | H           |                   | 0.60754000  | 2.14117700  |
|     |             |                   |             | 2.22744400  |



|     |             |                   |             |             |             |
|-----|-------------|-------------------|-------------|-------------|-------------|
| 151 | <b>OP2:</b> | -1175.863820 a.u. |             |             |             |
| 152 | S           | 0.22470400        | 1.79855500  | 0.14686600  |             |
| 153 | O           | -2.59903100       | -1.36530500 | 0.94584700  |             |
| 154 | O           | 0.59918500        | 2.95266400  | -0.93994700 |             |
| 155 | O           | 0.11427500        | 2.34847600  | 1.48690000  |             |
| 156 | N           | -1.15188700       | 1.37618400  | -0.67677700 |             |
| 157 | N           | -1.63875400       | -0.36356600 | 0.85517600  |             |
| 158 | N           | 4.10346000        | -2.58482200 | -0.19535600 |             |
| 159 | C           | 1.35294600        | 0.50447800  | 0.02070300  |             |
| 160 | C           | 1.66205700        | -0.05913200 | -1.23665100 |             |
| 161 | C           | 1.95594300        | 0.03309700  | 1.20612300  |             |
| 162 | C           | -1.95507500       | 0.29391000  | -0.23396600 |             |
| 163 | C           | 3.20517400        | -1.57704100 | -0.12336100 |             |
| 164 | C           | 2.57861100        | -1.08458400 | -1.30291100 |             |
| 165 | C           | 2.87100000        | -0.99421100 | 1.12825200  |             |
| 166 | C           | -3.11073200       | -0.21184200 | -0.88341600 |             |
| 167 | C           | -3.47528400       | -1.25910500 | -0.08040300 |             |
| 168 | C           | -4.58582700       | -2.24610800 | -0.12255400 |             |
| 169 | H           | -1.64297800       | 2.18684000  | -1.05116700 |             |
| 170 | H           | 1.19124400        | 0.30695200  | -2.14284400 |             |
| 171 | H           | 1.69167700        | 0.46446300  | 2.16488800  |             |
| 172 | H           | 2.82708500        | -1.52166700 | -2.26489000 |             |
| 173 | H           | 3.33510000        | -1.36700200 | 2.03577200  |             |
| 174 | H           | -3.58745100       | 0.13167300  | -1.78853000 |             |
| 175 | H           | -5.21069200       | -2.07191900 | -1.00006300 |             |
| 176 | H           | -4.19346100       | -3.26707000 | -0.16454200 |             |
| 177 | H           | -5.20741700       | -2.16270200 | 0.77473700  |             |
| 178 | H           | 4.34954600        | -3.00943500 | -1.07638800 |             |
| 179 | H           | 4.55409300        | -2.94649200 | 0.63139200  |             |
| 180 | H           |                   | 1.19993000  | 3.60144200  | -0.52281000 |

|     |              |                   |             |             |            |
|-----|--------------|-------------------|-------------|-------------|------------|
| 181 | <b>TSP1:</b> | -1175.864801 a.u. |             |             |            |
| 182 | S            | 0.30390300        | 1.80422600  | 0.06453400  |            |
| 183 | O            | -3.00926500       | -1.06922200 | 0.92117600  |            |
| 184 | O            | 0.77881900        | 2.99987300  | -0.60474300 |            |
| 185 | O            | -0.05443900       | 1.92088400  | 1.61056400  |            |
| 186 | N            | -1.20868400       | 1.50072200  | -0.60419400 |            |
| 187 | N            | -2.10331300       | -0.01532000 | 0.95528800  |            |
| 188 | N            | 4.20221100        | -2.58033900 | -0.11739600 |            |
| 189 | C            | 1.44262700        | 0.50887200  | 0.06749500  |            |
| 190 | C            | 2.46533900        | 0.54807500  | -0.90770300 |            |
| 191 | C            | 1.33302500        | -0.57287200 | 0.97051900  |            |
| 192 | C            | -2.02807100       | 0.39653800  | -0.29192200 |            |
| 193 | C            | 3.29832800        | -1.57618500 | -0.06213200 |            |
| 194 | C            | 3.37973100        | -0.48071000 | -0.96450600 |            |
| 195 | C            | 2.25340900        | -1.59641700 | 0.90148700  |            |
| 196 | C            | -2.86752300       | -0.33483100 | -1.17090700 |            |
| 197 | C            | -3.46883300       | -1.24232800 | -0.33931700 |            |
| 198 | C            | -4.46874400       | -2.32151100 | -0.54900800 |            |
| 199 | H            | -1.26574800       | 1.88447400  | -1.54392600 |            |
| 200 | H            | 2.54992900        | 1.39031200  | -1.58574300 |            |
| 201 | H            | 0.54724300        | -0.59514600 | 1.71610700  |            |
| 202 | H            | 4.18027700        | -0.44563700 | -1.69665800 |            |
| 203 | H            | 2.18656900        | -2.42241100 | 1.60261900  |            |
| 204 | H            | -3.00972600       | -0.21108900 | -2.23360400 |            |
| 205 | H            | -5.37575600       | -2.12086200 | 0.03040300  |            |
| 206 | H            | -4.73473100       | -2.38876600 | -1.60512900 |            |
| 207 | H            | -4.06925000       | -3.28653100 | -0.22179800 |            |
| 208 | H            | 4.96659300        | -2.56350500 | -0.77519400 |            |
| 209 | H            | 4.17429800        | -3.34870300 | 0.53530600  |            |
| 210 | H            |                   | -1.00029200 | 2.12073700  | 1.76918400 |

|     |              |                   |             |             |
|-----|--------------|-------------------|-------------|-------------|
| 211 | <b>TSP2:</b> | -1175.810474 a.u. |             |             |
| 212 | S            | 0.27733500        | 1.80151300  | -0.07849600 |
| 213 | O            | -2.63455700       | -1.19981100 | 1.11533100  |
| 214 | O            | 0.63064700        | 3.09561800  | -0.85130200 |
| 215 | O            | 0.28492100        | 2.53743600  | 1.27486500  |
| 216 | N            | -1.14287100       | 1.34124300  | -0.76435000 |
| 217 | N            | -1.69046600       | -0.19730600 | 0.94536200  |
| 218 | N            | 4.03197100        | -2.68215600 | -0.08468600 |
| 219 | C            | 1.32057600        | 0.44794000  | -0.07064700 |
| 220 | C            | 1.37636600        | -0.41682800 | -1.18902500 |
| 221 | C            | 2.17726600        | 0.26762100  | 1.04056100  |
| 222 | C            | -1.95034100       | 0.29582300  | -0.24137500 |
| 223 | C            | 3.14922000        | -1.66148700 | -0.07972000 |
| 224 | C            | 2.27863700        | -1.45480400 | -1.18786600 |
| 225 | C            | 3.07206100        | -0.77770200 | 1.03164600  |
| 226 | C            | -3.05309700       | -0.32261900 | -0.88312100 |
| 227 | C            | -3.45030200       | -1.25795900 | 0.03552500  |
| 228 | C            | -4.54211700       | -2.26550300 | 0.07090900  |
| 229 | H            | -1.61517700       | 2.12612600  | -1.21244100 |
| 230 | H            | 0.72308900        | -0.26894900 | -2.04185900 |
| 231 | H            | 2.11440500        | 0.93129400  | 1.89495400  |
| 232 | H            | 2.33093800        | -2.12178900 | -2.04251300 |
| 233 | H            | 3.72255000        | -0.93194700 | 1.88659400  |
| 234 | H            | -3.48018900       | -0.11572400 | -1.85228900 |
| 235 | H            | -5.10147800       | -2.24820600 | -0.86591900 |
| 236 | H            | -4.13548200       | -3.27021900 | 0.22267300  |
| 237 | H            | -5.23063700       | -2.05482500 | 0.89567800  |
| 238 | H            | 4.10403000        | -3.31326200 | -0.86845800 |
| 239 | H            | 4.65807800        | -2.83933400 | 0.69077300  |
| 240 | H            |                   | 0.56438400  | 3.45730900  |
|     |              |                   |             | 0.40199600  |

|     |                     |             |             |             |
|-----|---------------------|-------------|-------------|-------------|
| 241 | A: -835.201132 a.u. |             |             |             |
| 242 | S                   | 2.04480300  | -0.00000200 | -0.00000100 |
| 243 | O                   | 2.69641700  | -1.29691700 | 0.00001600  |
| 244 | O                   | 2.69639200  | 1.29692600  | -0.00001200 |
| 245 | N                   | -3.76147400 | -0.00000100 | -0.00000800 |
| 246 | C                   | 0.36112300  | 0.00000100  | 0.00000700  |
| 247 | C                   | -0.33674600 | -1.24654100 | -0.00001100 |
| 248 | C                   | -0.33674400 | 1.24654400  | 0.00000200  |
| 249 | C                   | -2.42579000 | -0.00000300 | 0.00000300  |
| 250 | C                   | -1.70344300 | -1.23807200 | -0.00000400 |
| 251 | C                   | -1.70344100 | 1.23806700  | 0.00000800  |
| 252 | H                   | 0.21172700  | -2.18212000 | -0.00002400 |
| 253 | H                   | 0.21173000  | 2.18212100  | -0.00000300 |
| 254 | H                   | -2.24927400 | -2.17617300 | -0.00001100 |
| 255 | H                   | -2.24927300 | 2.17616800  | 0.00001000  |
| 256 | H                   | -4.29183300 | -0.86143200 | 0.00001900  |
| 257 | H                   |             | -4.29183100 | 0.86143200  |
|     |                     |             |             | 0.00002900  |

|     |                |                  |             |             |            |
|-----|----------------|------------------|-------------|-------------|------------|
| 258 | <b>API(T):</b> | -835.342544 a.u. |             |             |            |
| 259 | S              | 2.11608600       | -0.07480100 | -0.31673000 |            |
| 260 | O              | 2.60795900       | -1.33448300 | 0.28667900  |            |
| 261 | O              | 2.48672600       | 1.29045800  | 0.43229200  |            |
| 262 | N              | -3.79509300      | 0.01616600  | 0.13834300  |            |
| 263 | C              | 0.27853300       | -0.01123100 | -0.15336300 |            |
| 264 | C              | -0.37739500      | -1.25334700 | -0.06001700 |            |
| 265 | C              | -0.36609100      | 1.23880500  | -0.16845800 |            |
| 266 | C              | -2.46592000      | 0.00614100  | 0.03994000  |            |
| 267 | C              | -1.75560600      | -1.24645200 | 0.03987600  |            |
| 268 | C              | -1.74558300      | 1.24923300  | -0.06648700 |            |
| 269 | H              | 0.16588400       | -2.19335300 | -0.05423200 |            |
| 270 | H              | 0.18123200       | 2.17191900  | -0.24888700 |            |
| 271 | H              | -2.29969100      | -2.18390600 | 0.11839800  |            |
| 272 | H              | -2.28353100      | 2.19345300  | -0.07746400 |            |
| 273 | H              | -4.33796000      | -0.84437500 | 0.21708600  |            |
| 274 | H              | -4.33125000      | 0.88437700  | 0.14239700  |            |
| 275 | H              |                  | 3.44849200  | 1.50885700  | 0.46126800 |

|     |             |                   |             |             |             |
|-----|-------------|-------------------|-------------|-------------|-------------|
| 276 | <b>TSD:</b> | -1175.807820 a.u. |             |             |             |
| 277 | S           | 0.15863400        | -0.12392600 | 0.46031900  |             |
| 278 | O           | -4.23693300       | -0.90441600 | -0.74779100 |             |
| 279 | O           | 0.80969800        | -0.23134700 | 1.81975100  |             |
| 280 | O           | -0.34832100       | -1.36820300 | -0.17385100 |             |
| 281 | N           | -1.62544000       | 0.61003500  | 1.04607400  |             |
| 282 | N           | -3.00761800       | -0.88262700 | -0.12430000 |             |
| 283 | N           | 6.11533700        | 0.26092000  | -0.90703700 |             |
| 284 | C           | 2.14822400        | 0.04765600  | 0.09618400  |             |
| 285 | C           | 2.68923500        | 1.31536600  | -0.09007700 |             |
| 286 | C           | 2.89449600        | -1.12638300 | 0.19444200  |             |
| 287 | C           | -2.77756200       | 0.32837000  | 0.43259000  |             |
| 288 | C           | 4.81436400        | 0.19120800  | -0.52766900 |             |
| 289 | C           | 4.02379600        | 1.37317600  | -0.45896500 |             |
| 290 | C           | 4.22235700        | -1.05421100 | -0.19687100 |             |
| 291 | C           | -3.98224600       | 1.08121900  | 0.25368400  |             |
| 292 | C           | -4.82765100       | 0.28761800  | -0.46563900 |             |
| 293 | C           | -6.20965100       | 0.46127300  | -0.97638400 |             |
| 294 | H           | -1.56928500       | 1.54703800  | 1.43713400  |             |
| 295 | H           | 2.09073100        | 2.21684100  | -0.03526100 |             |
| 296 | H           | 2.44541100        | -2.06665600 | 0.48730700  |             |
| 297 | H           | 4.45919200        | 2.33038300  | -0.73014800 |             |
| 298 | H           | 4.81239800        | -1.96477200 | -0.24007500 |             |
| 299 | H           | -4.17516700       | 2.07950800  | 0.61496900  |             |
| 300 | H           | -6.56729400       | 1.46614600  | -0.74793200 |             |
| 301 | H           | -6.24152600       | 0.30769200  | -2.05958200 |             |
| 302 | H           | -6.88165400       | -0.26817000 | -0.51222200 |             |
| 303 | H           | 6.56315800        | 1.14638900  | -1.08735000 |             |
| 304 | H           | 6.70109000        | -0.56018500 | -0.91861600 |             |
| 305 | H           |                   | -2.31887800 | -1.56970700 | -0.42913800 |

|     |                |                   |             |             |            |
|-----|----------------|-------------------|-------------|-------------|------------|
| 306 | <b>TSD(T):</b> | -1175.800778 a.u. |             |             |            |
| 307 | S              | -0.10765600       | 0.65526700  | -0.07662100 |            |
| 308 | O              | -4.25343800       | -1.27567000 | 0.36496400  |            |
| 309 | O              | 0.47276500        | 1.37518500  | 1.09364100  |            |
| 310 | O              | -0.41675500       | -0.79958300 | 0.15612900  |            |
| 311 | N              | -1.96360400       | 1.35308400  | -0.03621000 |            |
| 312 | N              | -3.03196100       | -0.64522300 | 0.57559500  |            |
| 313 | N              | 6.50231900        | -0.76933400 | -0.01996800 |            |
| 314 | C              | 2.55821900        | 0.20788800  | -0.25811100 |            |
| 315 | C              | 3.47879000        | 1.26184400  | -0.25944000 |            |
| 316 | C              | 2.87427500        | -1.15225600 | -0.16943100 |            |
| 317 | C              | -3.04563400       | 0.58846500  | 0.00583000  |            |
| 318 | C              | 5.20203400        | -0.44638600 | -0.09890000 |            |
| 319 | C              | 4.81583100        | 0.93428800  | -0.18354600 |            |
| 320 | C              | 4.21026500        | -1.48586800 | -0.09215300 |            |
| 321 | C              | -4.39314700       | 0.81447400  | -0.43108200 |            |
| 322 | C              | -5.06860000       | -0.34453600 | -0.19497700 |            |
| 323 | C              | -6.47465900       | -0.76746800 | -0.41452600 |            |
| 324 | H              | -2.08097300       | 2.27246200  | -0.44917500 |            |
| 325 | H              | 3.15004800        | 2.29496200  | -0.30041000 |            |
| 326 | H              | 2.09098100        | -1.90374000 | -0.15384100 |            |
| 327 | H              | 5.58224200        | 1.70447000  | -0.17549900 |            |
| 328 | H              | 4.52566400        | -2.52330000 | -0.02001600 |            |
| 329 | H              | -4.78160200       | 1.71704200  | -0.87660000 |            |
| 330 | H              | -7.02297700       | 0.01551100  | -0.94024200 |            |
| 331 | H              | -6.51154100       | -1.68820900 | -1.00493500 |            |
| 332 | H              | -6.96741600       | -0.96208700 | 0.54387800  |            |
| 333 | H              | 7.22484600        | -0.05993700 | -0.01661400 |            |
| 334 | H              | 6.80539000        | -1.73317600 | 0.04658600  |            |
| 335 | H              |                   | -2.20425700 | -1.25008800 | 0.59702400 |

|     |                                 |             |             |             |
|-----|---------------------------------|-------------|-------------|-------------|
| 336 | <b>ReNP3: -1175.900944 a.u.</b> |             |             |             |
| 337 | S                               | 0.05602800  | 0.19226100  | 1.17104200  |
| 338 | O                               | 4.09523500  | -1.14531500 | -0.37517800 |
| 339 | O                               | -0.65834400 | 0.41716900  | -0.32144100 |
| 340 | O                               | 0.51376400  | -1.21221600 | 1.29099500  |
| 341 | N                               | 1.54567300  | 1.04391700  | 0.69681400  |
| 342 | N                               | 2.82046200  | -0.85909600 | 0.05911400  |
| 343 | N                               | -6.20742500 | -0.29475400 | -0.45077300 |
| 344 | C                               | -2.07252400 | 0.22261800  | -0.29439900 |
| 345 | C                               | -2.90276500 | 1.34241000  | -0.28179200 |
| 346 | C                               | -2.59798200 | -1.06832400 | -0.34537500 |
| 347 | C                               | 2.66778800  | 0.46119300  | 0.22539500  |
| 348 | C                               | -4.84558900 | -0.12566900 | -0.36975900 |
| 349 | C                               | -4.28118500 | 1.16883600  | -0.32101300 |
| 350 | C                               | -3.97764600 | -1.23934300 | -0.37998700 |
| 351 | C                               | 3.88843500  | 1.07328300  | -0.17754400 |
| 352 | C                               | 4.72169500  | 0.04894200  | -0.53102800 |
| 353 | C                               | 6.11485800  | -0.00770900 | -1.03480000 |
| 354 | H                               | 1.50045000  | 2.05751000  | 0.68109300  |
| 355 | H                               | -2.47516700 | 2.33972500  | -0.25794600 |
| 356 | H                               | -1.93767700 | -1.92873300 | -0.37083000 |
| 357 | H                               | -4.93083000 | 2.03906400  | -0.32279600 |
| 358 | H                               | -4.39064400 | -2.24253100 | -0.42765200 |
| 359 | H                               | 4.10755000  | 2.12969000  | -0.19323000 |
| 360 | H                               | 6.53288200  | 0.99829900  | -1.08800500 |
| 361 | H                               | 6.73587200  | -0.61877500 | -0.37207500 |
| 362 | H                               | 6.14098300  | -0.45790500 | -2.03259700 |
| 363 | H                               | -6.81744300 | 0.48350200  | -0.25458900 |
| 364 | H                               | -6.60449700 | -1.20844900 | -0.29638400 |
| 365 | H                               |             | 2.23533200  | -1.63257000 |
|     |                                 |             |             | 0.36906100  |



|     |                                                                                 |             |             |             |            |
|-----|---------------------------------------------------------------------------------|-------------|-------------|-------------|------------|
| 366 | C <sub>4</sub> H <sub>6</sub> O <sub>2</sub> N <sub>2</sub> S: -814.019104 a.u. |             |             |             |            |
| 367 | S                                                                               | -2.53678800 | 0.25796100  | -0.41084000 |            |
| 368 | O                                                                               | 1.61616900  | -1.09517900 | -0.26363400 |            |
| 369 | O                                                                               | -2.75803400 | -0.97202400 | 0.73178900  |            |
| 370 | N                                                                               | -1.12883500 | 1.05842000  | 0.06787800  |            |
| 371 | N                                                                               | 0.23224500  | -0.84702300 | -0.25728200 |            |
| 372 | C                                                                               | 0.12005200  | 0.43641400  | 0.01797200  |            |
| 373 | C                                                                               | 1.38951100  | 1.05589800  | 0.23283200  |            |
| 374 | C                                                                               | 2.28061200  | 0.04266900  | 0.03695300  |            |
| 375 | C                                                                               | 3.76686300  | -0.04000300 | 0.07373000  |            |
| 376 | H                                                                               | -1.22955300 | 1.76038600  | 0.79318400  |            |
| 377 | H                                                                               | 1.59706600  | 2.09002000  | 0.46221300  |            |
| 378 | H                                                                               | 4.19182600  | 0.93171100  | 0.33346900  |            |
| 379 | H                                                                               | 4.09613800  | -0.77627400 | 0.81445300  |            |
| 380 | H                                                                               | 4.16270700  | -0.34664200 | -0.90021000 |            |
| 381 | H                                                                               |             | -2.16075200 | -1.69859900 | 0.48199500 |

|     |             |                  |             |             |             |
|-----|-------------|------------------|-------------|-------------|-------------|
| 382 | <b>TS1:</b> | -835.146075 a.u. |             |             |             |
| 383 | S           | -2.21577200      | 0.31350900  | -0.00201600 |             |
| 384 | O           | -2.06232400      | -0.41726500 | 1.30899200  |             |
| 385 | O           | -2.94267800      | -0.28821300 | -1.12533200 |             |
| 386 | N           | 3.74174400       | -0.16329400 | -0.11172900 |             |
| 387 | C           | -0.33625800      | 0.17309500  | -0.07194200 |             |
| 388 | C           | 0.22879800       | -1.12762800 | 0.01155600  |             |
| 389 | C           | 0.42813600       | 1.35055500  | 0.07345500  |             |
| 390 | C           | 2.41202100       | -0.06521700 | -0.04931700 |             |
| 391 | C           | 1.59392700       | -1.24028700 | -0.05764200 |             |
| 392 | C           | 1.79517100       | 1.23519600  | 0.02133000  |             |
| 393 | H           | -0.40491400      | -2.00641700 | 0.03055600  |             |
| 394 | H           | -0.04439800      | 2.32522400  | 0.12766000  |             |
| 395 | H           | 2.05774700       | -2.21970700 | -0.12325200 |             |
| 396 | H           | 2.41747000       | 2.12493700  | -0.00014500 |             |
| 397 | H           | 4.20549800       | -1.06307300 | -0.15511200 |             |
| 398 | H           | 4.33798200       | 0.65550300  | -0.09926200 |             |
| 399 |             |                  |             |             |             |
| 400 | <b>P1:</b>  | -835.219879 a.u. |             |             |             |
| 401 | O           | -3.94632100      | 0.39097000  | -0.00000200 |             |
| 402 | N           | 3.99523300       | -0.23549500 | -0.00000100 |             |
| 403 | C           | -0.11371900      | 0.22687000  | 0.00000200  |             |
| 404 | C           | 0.71511500       | 1.37423100  | 0.00000100  |             |
| 405 | C           | 0.43617400       | -1.07549400 | 0.00000200  |             |
| 406 | C           | 2.66058300       | -0.07712400 | -0.00000100 |             |
| 407 | C           | 2.08051700       | 1.22567900  | 0.00000000  |             |
| 408 | C           | 1.80182400       | -1.22396700 | 0.00000000  |             |
| 409 | H           | 0.25380700       | 2.35584100  | 0.00000000  |             |
| 410 | H           | -0.19883700      | -1.95562100 | 0.00000300  |             |
| 411 | H           | 2.72266500       | 2.10057700  | -0.00000100 |             |
| 412 | H           | 2.23829300       | -2.21776000 | 0.00000000  |             |
| 413 | H           | 4.62078300       | 0.55877400  | -0.00000200 |             |
| 414 | H           | 4.42083800       | -1.15232500 | -0.00000200 |             |
| 415 | O           | -1.44255000      | 0.48766900  | 0.00000200  |             |
| 416 | S           |                  | -2.77476100 | -0.48570600 | -0.00000100 |

|     |                 |                  |             |             |             |
|-----|-----------------|------------------|-------------|-------------|-------------|
| 417 | <b>TS11(T):</b> | -835.150250 a.u. |             |             |             |
| 418 | S               | -2.72020400      | -0.03359700 | -0.29551100 |             |
| 419 | O               | -2.78479800      | 1.31965600  | 0.26818800  |             |
| 420 | O               | -2.91858100      | -1.18948000 | 0.58386400  |             |
| 421 | N               | 4.00757200       | 0.06154400  | 0.19485800  |             |
| 422 | C               | -0.01613100      | -0.07061000 | -0.24112200 |             |
| 423 | C               | 0.55652100       | 1.19860700  | -0.12764700 |             |
| 424 | C               | 0.64882800       | -1.29879800 | -0.22185800 |             |
| 425 | C               | 2.68032000       | 0.01825000  | 0.04784000  |             |
| 426 | C               | 1.92743700       | 1.24627700  | 0.01972600  |             |
| 427 | C               | 2.02008400       | -1.25656300 | -0.07502800 |             |
| 428 | H               | -0.04824700      | 2.10038300  | -0.14133400 |             |
| 429 | H               | 0.11673800       | -2.24134300 | -0.30627500 |             |
| 430 | H               | 2.44576700       | 2.19604900  | 0.11961000  |             |
| 431 | H               | 2.60731700       | -2.17032100 | -0.04662200 |             |
| 432 | H               | 4.50481000       | 0.94134600  | 0.28829400  |             |
| 433 | H               | 4.56854800       | -0.78374900 | 0.22261200  |             |
| 434 |                 |                  |             |             |             |
| 435 | <b>P11(T):</b>  | -835.160701 a.u. |             |             |             |
| 436 | S               | 3.48990700       | -0.00002300 | -0.00003900 |             |
| 437 | O               | 2.72327300       | 1.25179700  | -0.00001800 |             |
| 438 | O               | 2.72321600       | -1.25180800 | -0.00001800 |             |
| 439 | N               | -4.23190000      | -0.00008900 | -0.00008800 |             |
| 440 | C               | -0.17822700      | 0.00009200  | 0.00010800  |             |
| 441 | C               | -0.80544500      | 1.24975600  | 0.00007900  |             |
| 442 | C               | -0.80533300      | -1.24962800 | 0.00007800  |             |
| 443 | C               | -2.89460800      | -0.00003000 | -0.00002300 |             |
| 444 | C               | -2.18427200      | 1.25330700  | 0.00001100  |             |
| 445 | C               | -2.18415900      | -1.25330200 | 0.00001200  |             |
| 446 | H               | -0.22989800      | 2.16999800  | 0.00010500  |             |
| 447 | H               | -0.22970100      | -2.16981700 | 0.00010300  |             |
| 448 | H               | -2.74400800      | 2.18472100  | -0.00001800 |             |
| 449 | H               | -2.74381100      | -2.18476600 | -0.00001600 |             |
| 450 | H               | -4.76375200      | 0.86344200  | -0.00011500 |             |
| 451 | H               |                  | -4.76367500 | -0.86366800 | -0.00011400 |

|     |                                  |             |             |             |
|-----|----------------------------------|-------------|-------------|-------------|
| 452 | <b>TS12(T): -835.150925 a.u.</b> |             |             |             |
| 453 | N                                | 4.01871200  | -0.42289200 | 0.15534200  |
| 454 | C                                | 0.03982100  | 0.33837700  | -0.22561700 |
| 455 | C                                | 0.89834500  | 1.44138900  | -0.14326700 |
| 456 | C                                | 0.43481400  | -1.00590900 | -0.19967300 |
| 457 | C                                | 2.71090300  | -0.17228900 | 0.02692600  |
| 458 | C                                | 2.24619300  | 1.18946500  | -0.01370900 |
| 459 | C                                | 1.78159100  | -1.26704300 | -0.06932100 |
| 460 | H                                | 0.51187900  | 2.45533400  | -0.16915700 |
| 461 | H                                | -0.28905100 | -1.81234600 | -0.26450000 |
| 462 | H                                | 2.96369000  | 2.00185400  | 0.06390500  |
| 463 | H                                | 2.15192300  | -2.28794800 | -0.03039000 |
| 464 | H                                | 4.69918700  | 0.32580400  | 0.22439300  |
| 465 | H                                | 4.37799700  | -1.37071100 | 0.18597000  |
| 466 | O                                | -1.83357900 | 0.82597300  | 0.38720600  |
| 467 | O                                | -3.30423800 | -1.20955500 | 0.17341800  |
| 468 | S                                | -3.13212900 | 0.22331100  | -0.11466500 |
| 469 |                                  |             |             |             |
| 470 | <b>P12(T): -835.228536 a.u.</b>  |             |             |             |
| 471 | O                                | -2.90500300 | -1.06651100 | 0.71978200  |
| 472 | N                                | 3.79075000  | -0.61010600 | 0.02614100  |
| 473 | C                                | -0.19183800 | 0.52741900  | -0.05052500 |
| 474 | C                                | 0.82662100  | 1.51098200  | 0.12996400  |
| 475 | C                                | 0.15137100  | -0.84602500 | -0.20007100 |
| 476 | C                                | 2.50235500  | -0.23850900 | 0.00093000  |
| 477 | C                                | 2.14342300  | 1.14074000  | 0.15470000  |
| 478 | C                                | 1.47226900  | -1.21751600 | -0.17801900 |
| 479 | H                                | 0.52694200  | 2.54678200  | 0.24512000  |
| 480 | H                                | -0.61718300 | -1.59957100 | -0.31646200 |
| 481 | H                                | 2.92085400  | 1.88618700  | 0.29163400  |
| 482 | H                                | 1.74346400  | -2.26282700 | -0.29087700 |
| 483 | H                                | 4.53491500  | 0.06511900  | 0.15348500  |
| 484 | H                                | 4.06646100  | -1.57908400 | -0.07834300 |
| 485 | O                                | -1.43951800 | 1.00868000  | -0.06101800 |
| 486 | S                                |             | -2.89873300 | 0.02589000  |
|     |                                  |             |             | -0.28747100 |

|     |                |             |      |             |  |             |
|-----|----------------|-------------|------|-------------|--|-------------|
| 487 | <b>TS2(T):</b> | -835.295913 | a.u. |             |  |             |
| 488 | O              | 3.08701100  |      | 1.00483600  |  | -0.35683000 |
| 489 | N              | -3.82410600 |      | 0.29563400  |  | -0.12896500 |
| 490 | C              | 0.17383000  |      | -0.20390800 |  | 0.07876400  |
| 491 | C              | -0.26110300 |      | 1.10286900  |  | 0.20613100  |
| 492 | C              | -0.55629200 |      | -1.36897800 |  | -0.10149000 |
| 493 | C              | -2.49335800 |      | 0.12809000  |  | -0.06472400 |
| 494 | C              | -1.64250600 |      | 1.26942200  |  | 0.12798300  |
| 495 | C              | -1.93238300 |      | -1.18842900 |  | -0.17994400 |
| 496 | H              | 0.40278200  |      | 1.94500500  |  | 0.37568800  |
| 497 | H              | -0.11392300 |      | -2.35850700 |  | -0.15626600 |
| 498 | H              | -2.06679400 |      | 2.26457900  |  | 0.23558600  |
| 499 | H              | -2.57678800 |      | -2.05508000 |  | -0.30453500 |
| 500 | H              | -4.25796400 |      | 1.21537600  |  | -0.04926800 |
| 501 | H              | -4.46176200 |      | -0.48983700 |  | -0.25986500 |
| 502 | O              | 1.78845700  |      | -0.46248900 |  | 1.16041700  |
| 503 | S              | 2.33206700  |      | -0.40204900 |  | -0.29564400 |
| 504 | H              | 3.79724400  |      | 1.06865100  |  | -1.03728500 |
| 505 |                |             |      |             |  |             |
| 506 | <b>P2(T):</b>  | -835.382437 | a.u. |             |  |             |
| 507 | S              | 2.11608600  |      | -0.07480100 |  | -0.31673000 |
| 508 | O              | 2.60795900  |      | -1.33448300 |  | 0.28667900  |
| 509 | O              | 2.48672600  |      | 1.29045800  |  | 0.43229200  |
| 510 | N              | -3.79509300 |      | 0.01616600  |  | 0.13834300  |
| 511 | C              | 0.27853300  |      | -0.01123100 |  | -0.15336300 |
| 512 | C              | -0.37739500 |      | -1.25334700 |  | -0.06001700 |
| 513 | C              | -0.36609100 |      | 1.23880500  |  | -0.16845800 |
| 514 | C              | -2.46592000 |      | 0.00614100  |  | 0.03994000  |
| 515 | C              | -1.75560600 |      | -1.24645200 |  | 0.03987600  |
| 516 | C              | -1.74558300 |      | 1.24923300  |  | -0.06648700 |
| 517 | H              | 0.16588400  |      | -2.19335300 |  | -0.05423200 |
| 518 | H              | 0.18123200  |      | 2.17191900  |  | -0.24888700 |
| 519 | H              | -2.29969100 |      | -2.18390600 |  | 0.11839800  |
| 520 | H              | -2.28353100 |      | 2.19345300  |  | -0.07746400 |
| 521 | H              | -4.33796000 |      | -0.84437500 |  | 0.21708600  |
| 522 | H              | -4.33125000 |      | 0.88437700  |  | 0.14239700  |
| 523 | H              |             |      | 3.44849200  |  | 1.50885700  |
|     |                |             |      |             |  | 0.46126800  |

|     |                            |                  |             |             |
|-----|----------------------------|------------------|-------------|-------------|
| 524 | <b>B:</b>                  | -361.851062 a.u. |             |             |
| 525 | N                          | -2.63793400      | 0.00000000  | -0.00000400 |
| 526 | C                          | 1.51285700       | 0.00000100  | 0.00000000  |
| 527 | C                          | 0.73892700       | 1.27496000  | 0.00000100  |
| 528 | C                          | 0.73892700       | -1.27496000 | 0.00000100  |
| 529 | C                          | -1.32273400      | 0.00000000  | 0.00000100  |
| 530 | C                          | -0.60929300      | 1.26811500  | 0.00000000  |
| 531 | C                          | -0.60929300      | -1.26811500 | 0.00000000  |
| 532 | H                          | 1.31558600       | 2.19495300  | 0.00000000  |
| 533 | H                          | 1.31558600       | -2.19495200 | 0.00000100  |
| 534 | H                          | -1.18439900      | 2.19000500  | 0.00000000  |
| 535 | H                          | -1.18439900      | -2.19000500 | -0.00000100 |
| 536 | H                          | -3.17226900      | 0.86363800  | 0.00000900  |
| 537 | H                          | -3.17226900      | -0.86363800 | 0.00000800  |
| 538 | O                          | 2.73141900       | -0.00000100 | -0.00000100 |
| 539 |                            |                  |             |             |
| 540 | <b>SO(T):</b>              | -473.358017 a.u. |             |             |
| 541 | S                          | 0.00000000       | 0.00000000  | 0.50522000  |
| 542 | O                          | 0.00000000       | 0.00000000  | -1.01043900 |
| 543 |                            |                  |             |             |
| 544 | <b>SOH<sup>+</sup>(T):</b> | -473.595541 a.u. |             |             |
| 545 | S                          | 0.03319800       | -0.58300600 | 0.00000000  |
| 546 | O                          | 0.03319800       | 0.97670600  | 0.00000000  |
| 547 | H                          |                  | -0.79674200 | 1.51445200  |
|     |                            |                  |             | 0.00000000  |

|     |                                         |             |             |             |
|-----|-----------------------------------------|-------------|-------------|-------------|
| 548 | <b>C(T):</b> -286.560706 a.u.           |             |             |             |
| 549 | N                                       | -2.20264500 | 0.00000000  | -0.00000100 |
| 550 | C                                       | 1.84940800  | 0.00000000  | 0.00000000  |
| 551 | C                                       | 1.22434800  | -1.24974600 | 0.00000000  |
| 552 | C                                       | 1.22434800  | 1.24974600  | 0.00000000  |
| 553 | C                                       | -0.86609500 | 0.00000000  | 0.00000100  |
| 554 | C                                       | -0.15516200 | -1.25305700 | 0.00000000  |
| 555 | C                                       | -0.15516200 | 1.25305700  | 0.00000000  |
| 556 | H                                       | 1.79244100  | -2.17477600 | 0.00000000  |
| 557 | H                                       | 1.79244100  | 2.17477600  | 0.00000000  |
| 558 | H                                       | -0.71300500 | -2.18550100 | 0.00000000  |
| 559 | H                                       | -0.71300400 | 2.18550100  | 0.00000000  |
| 560 | H                                       | -2.73523800 | -0.86359200 | 0.00000200  |
| 561 | H                                       | -2.73523800 | 0.86359200  | 0.00000300  |
| 562 |                                         |             |             |             |
| 563 | <b>SO<sub>2</sub>:</b> -548.592655 a.u. |             |             |             |
| 564 | S                                       | 0.00000000  | 0.00000000  | 0.37373000  |
| 565 | O                                       | 0.00000000  | 1.26065000  | -0.37373000 |
| 566 | O                                       | 0.00000000  | -1.26065000 | -0.37373000 |
